# Supplementary material for: Cell-type-specific control of secondary cell wall formation by Musashi-type translational regulators in Arabidopsis
Source: eLife. 2023 Sep 29;12:RP88207. doi: 10.7554/eLife.88207 (PMC10541177; doi:10.7554/eLife.88207)
Supplement: Figure 6—source data 2. — GXM1 and GXM3-specific primers were used on the various RNA fractions. [file elife-88207-fig6-data2.zip]

Archive with 1 entries (1 files):
- Data_RT_Figure 6.pdf
