# Supplementary figures and images for: Cell-type-specific control of secondary cell wall formation by Musashi-type translational regulators in Arabidopsis
Source: eLife journal article supplement (doi:10.7554/elife.88207), 2023-06-13

Figure 1- figure supplement 2B:

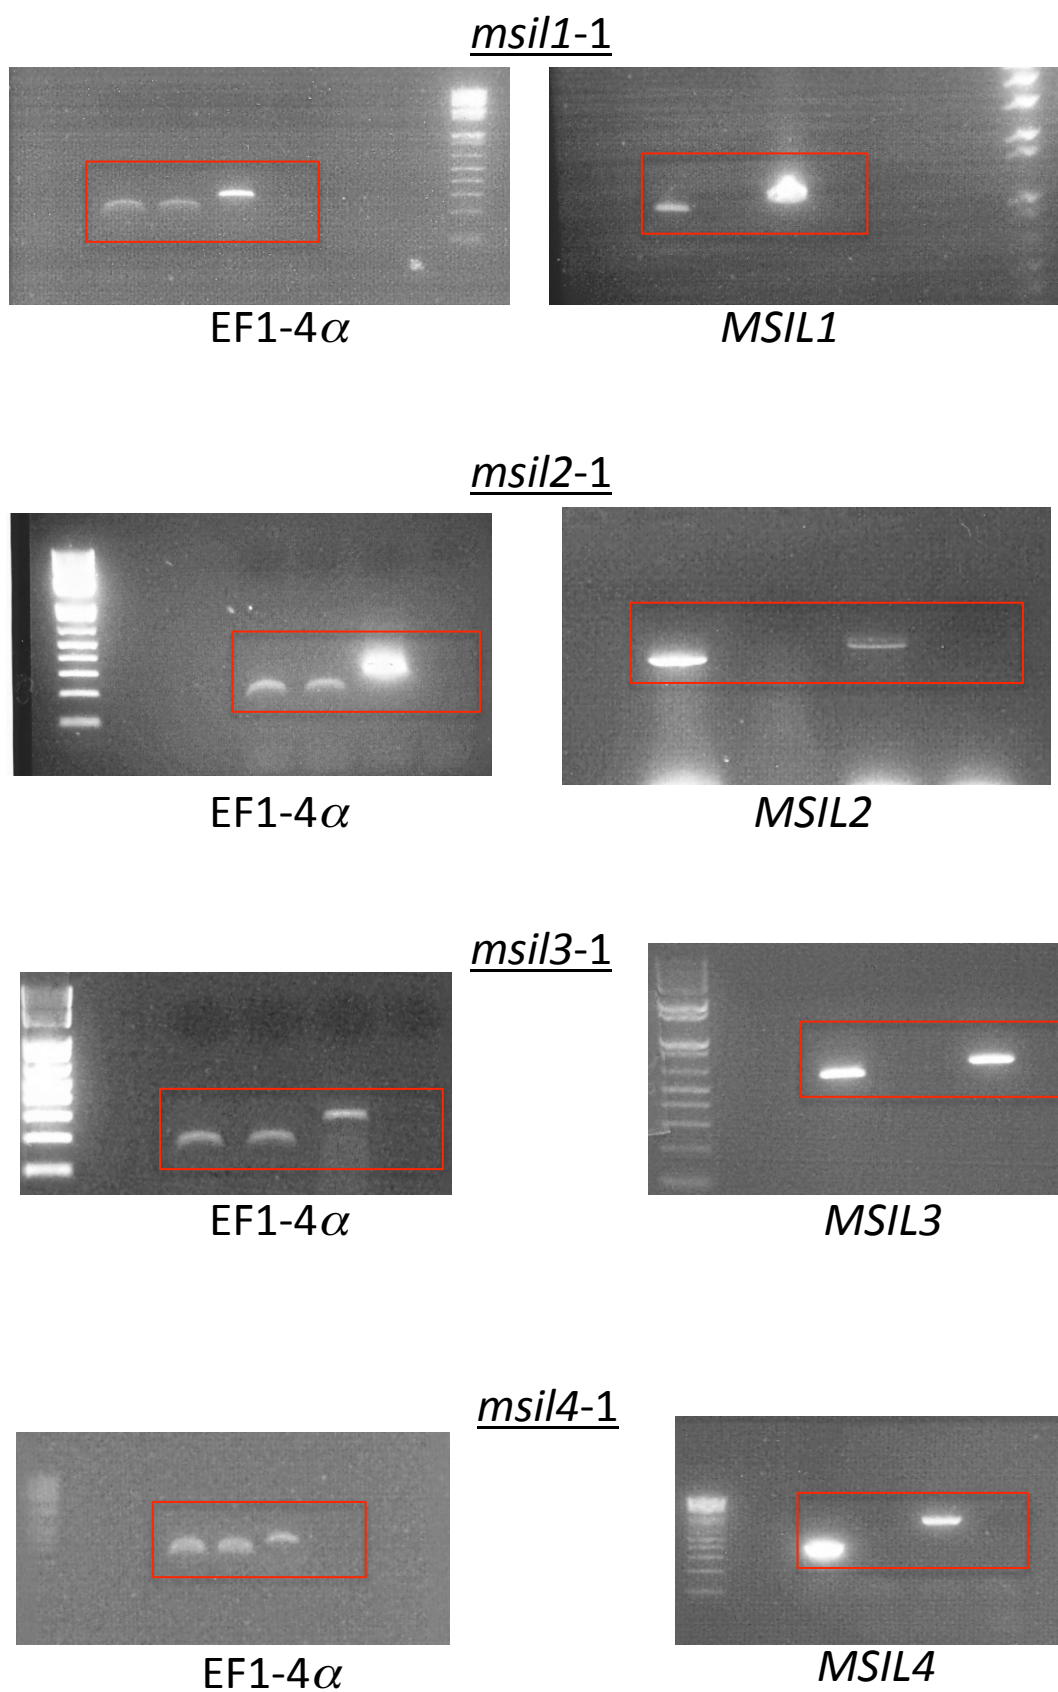

Supplement: fig1-figsupp2-data1 [file elife-88207-fig1-figsupp2-data1-v1.zip]

Figure 1- figure supplement 2C:

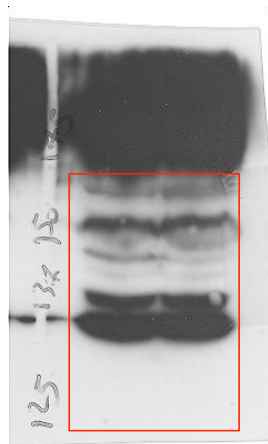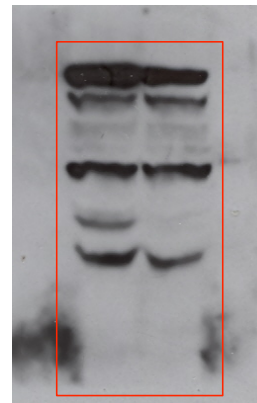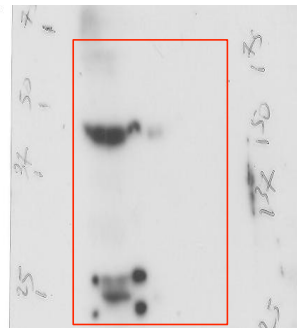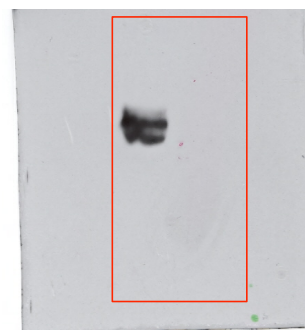

Supplement: fig1-figsupp2-data2 [file elife-88207-fig1-figsupp2-data2-v1.zip]

Figure 1- figure supplement 3D:

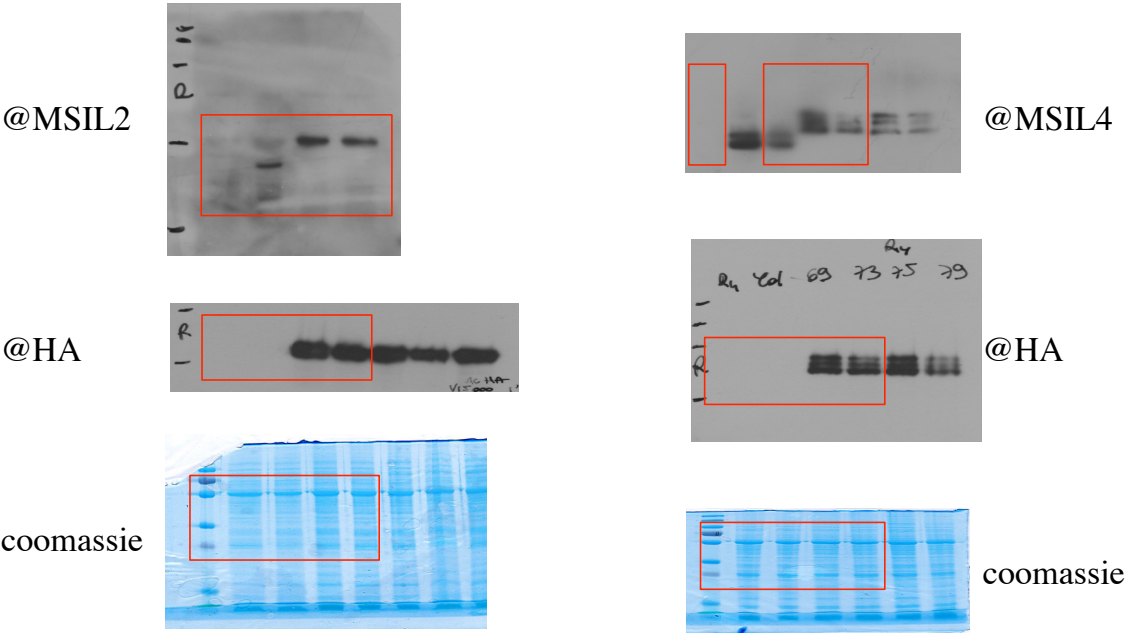

Supplement: fig1-figsupp3-data1 [file elife-88207-fig1-figsupp3-data1-v1.zip]

Figure 2C

MSIL4

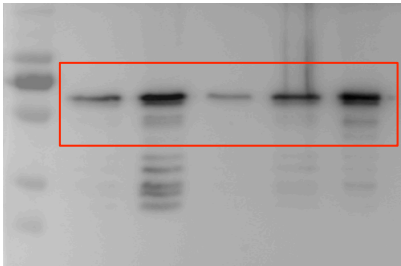

MSIL4<sup>RRM</sup>

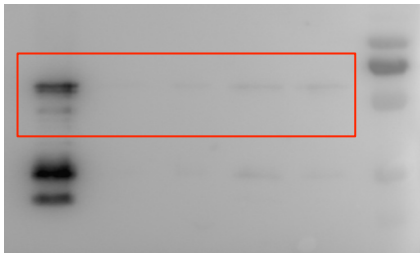

Supplement: fig2-data1 [file elife-88207-fig2-data1-v1.zip]

Figure 6D

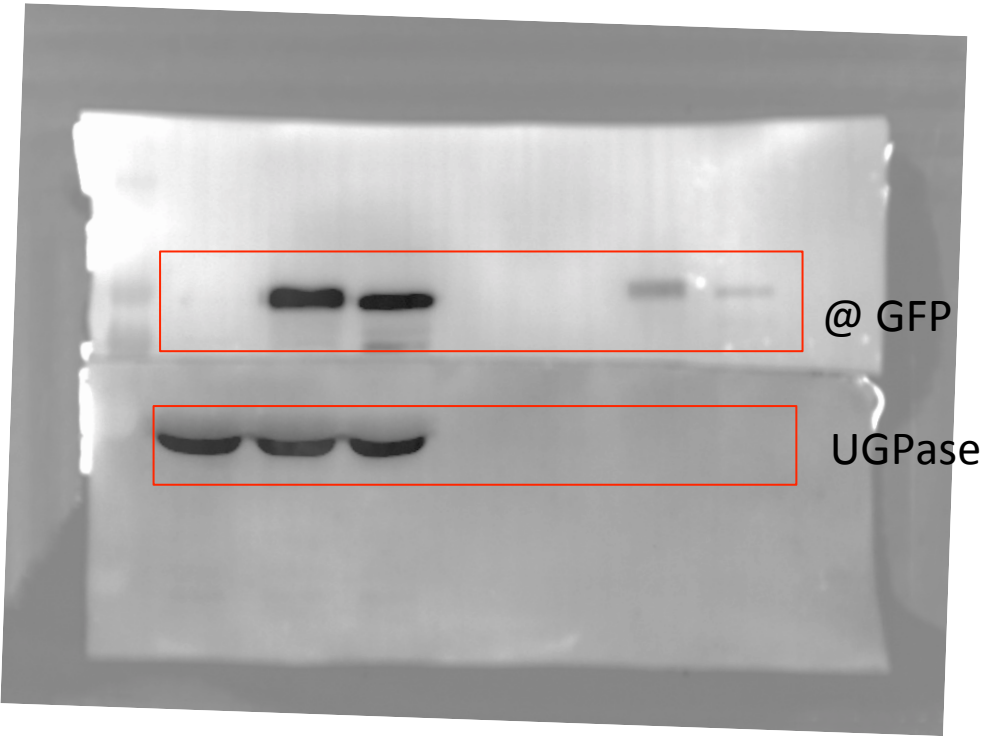

Supplement: fig6-data1 [file elife-88207-fig6-data1-v1.zip]

Figure 6D

Cut in Figure 6D to fit with the western image

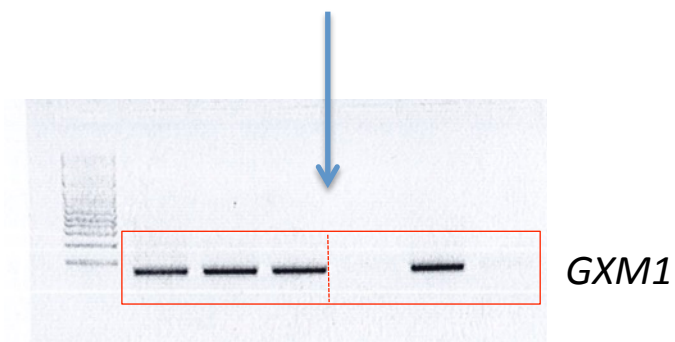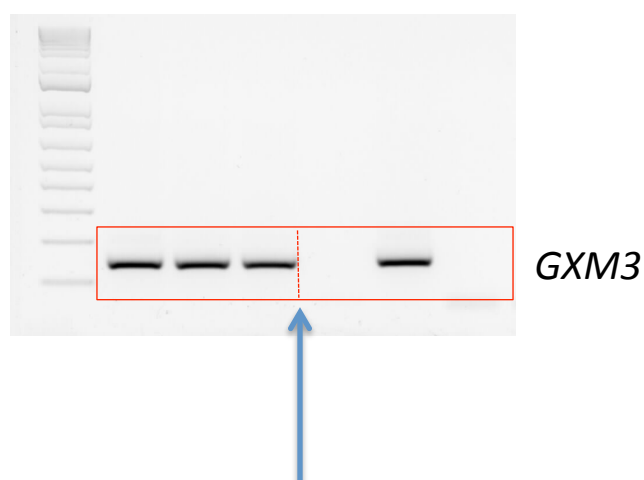

Cut in Figure 6D to fit with the western image

Supplement: fig6-data2 [file elife-88207-fig6-data2-v1.zip]
